# Supplementary material for: Substitution of silicon within the rhombohedral boron carbide (B4C) crystal lattice through high-energy ball-milling
Source: Royal Society of Chemistry journal article supplement (doi:10.1039/c5tc02956b), 2015-01-01

Figure S1: Structure of the lowest energy configuration derived from the substitution of Si in  $B_{11}C^p$ -CBC

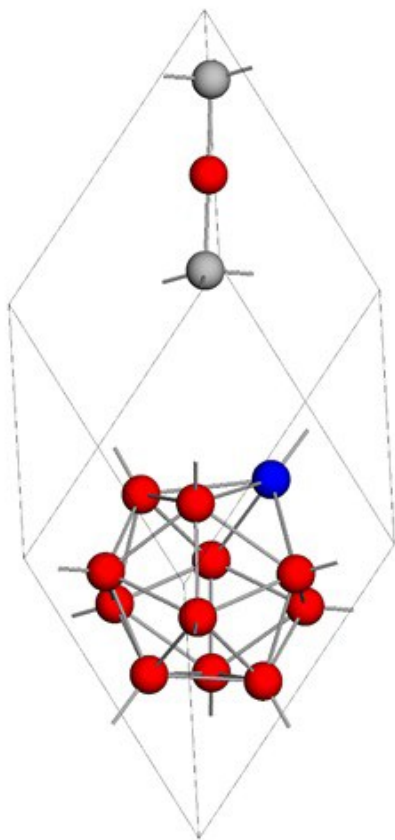

Supplement: c5tc02956b1.pdf [file c5tc02956b1.pdf]
