# Supplementary material for: Substitution of silicon within the rhombohedral boron carbide (B4C) crystal lattice through high-energy ball-milling
Source: Royal Society of Chemistry journal article supplement (doi:10.1039/c5tc02956b), 2015-01-01

Figure S3: XRD spectrum of the as-received  $B_4C$  sample after ball-milling under the same conditions as used during the production of the  $B_4C:Si$  sample.

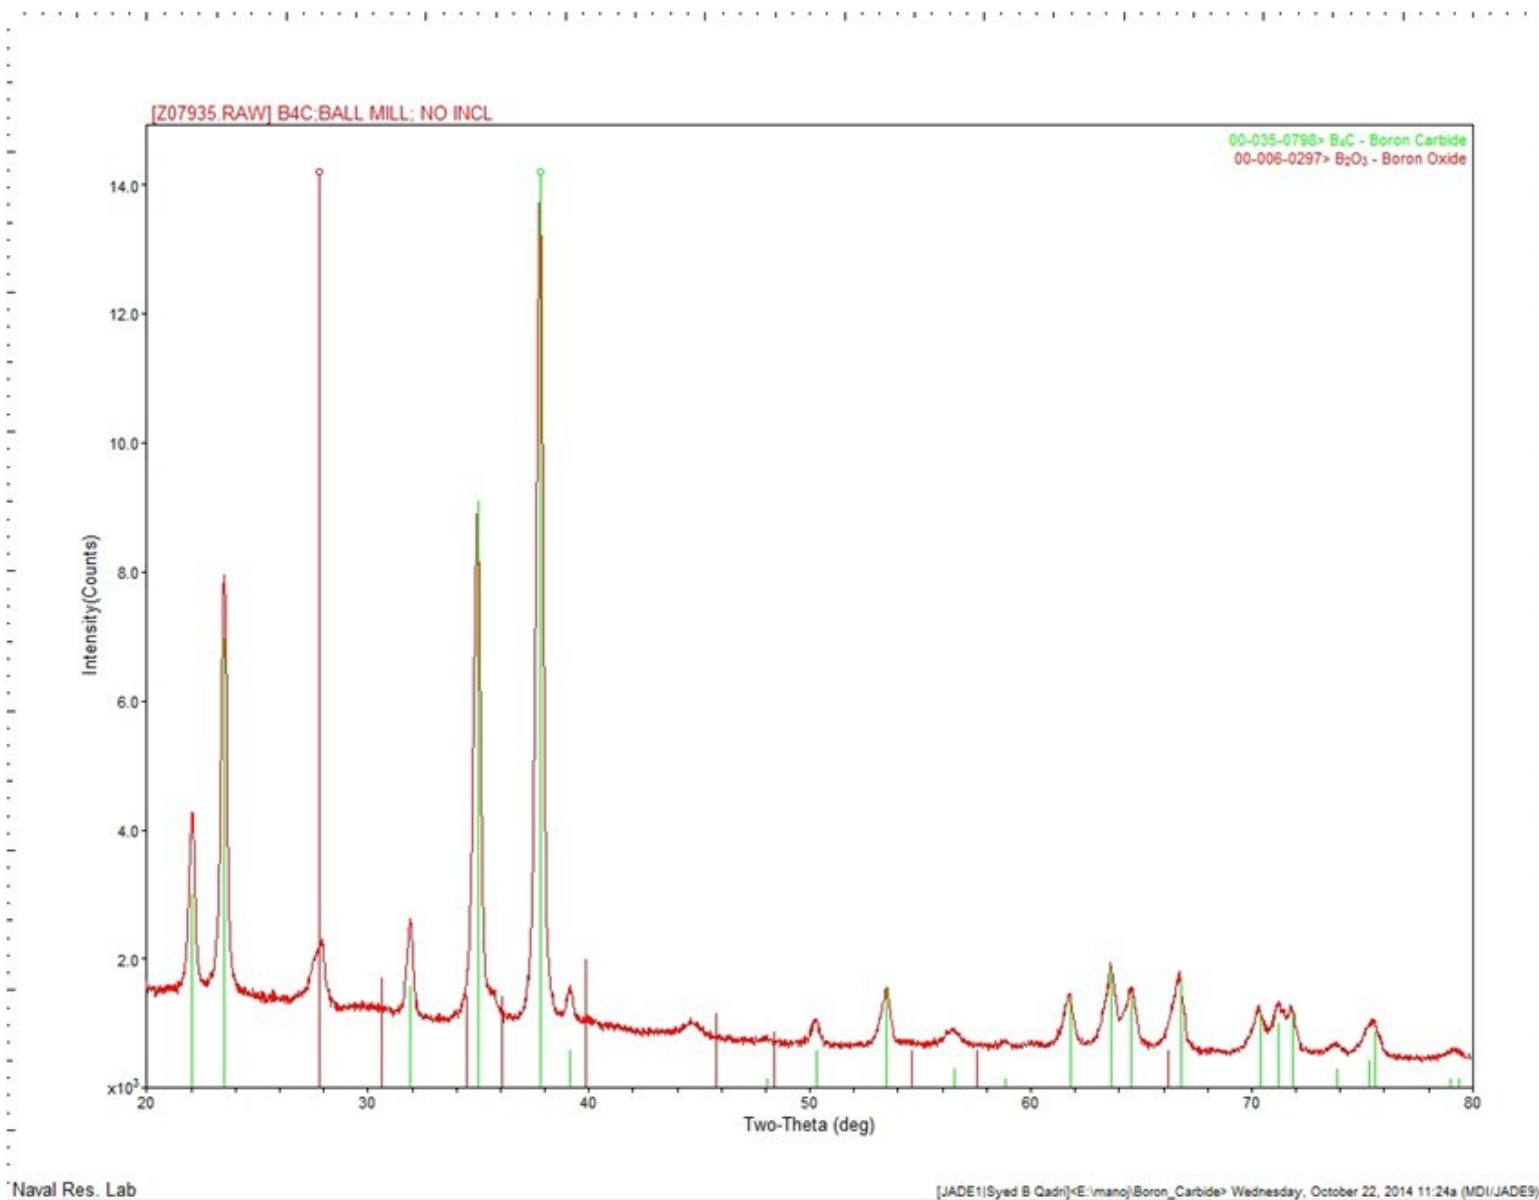

Supplement: c5tc02956b3.pdf [file c5tc02956b3.pdf]
