# Supplementary material for: Substitution of silicon within the rhombohedral boron carbide (B4C) crystal lattice through high-energy ball-milling
Source: Royal Society of Chemistry journal article supplement (doi:10.1039/c5tc02956b), 2015-01-01
Supplement: c5tc02956b4.pdf [file c5tc02956b4.pdf]

**Table S1.** Relaxed lattice constants **a** in [0001] plane (in Å) and **c** along (0001) direction (in Å), and unit cell volume **V** (in Å<sup>3</sup>).

| Structure                           | Site         | a    | c     | V     |
|-------------------------------------|--------------|------|-------|-------|
| B <sub>12</sub> -CCC                | No Si        | 5.64 | 12.12 | 111.4 |
|                                     | Chain Center | 5.62 | 12.62 | 115.1 |
|                                     | Chain End    | 6.17 | 11.77 | 129.0 |
|                                     | Equatorial   | 5.78 | 12.43 | 120.0 |
|                                     | Polar        | 5.70 | 12.70 | 118.7 |
| B <sub>12</sub> -CBC                | No Si        | 5.66 | 12.13 | 112.0 |
|                                     | Chain Center | 5.62 | 12.62 | 115.1 |
|                                     | Chain End    | 5.87 | 12.32 | 122.4 |
|                                     | Equatorial   | 5.79 | 12.45 | 120.5 |
|                                     | Polar        | 5.73 | 12.70 | 120.1 |
| B <sub>11</sub> C <sup>P</sup> -CBC | No Si        | 5.60 | 12.06 | 109.0 |
|                                     | Chain Center | 5.62 | 12.44 | 113.0 |
|                                     | Chain End    | 5.90 | 12.28 | 123.0 |
|                                     | Equatorial   | 5.71 | 12.59 | 118.2 |
|                                     | Polar        | 5.73 | 12.70 | 120.1 |
