# Supplementary material for: Substitution of silicon within the rhombohedral boron carbide (B4C) crystal lattice through high-energy ball-milling
Source: Royal Society of Chemistry journal article supplement (doi:10.1039/c5tc02956b), 2015-01-01
Supplement: c5tc02956b6.xlsx [file c5tc02956b6.xlsx]

## Sheet: Sheet 1
	polytype	elem.	site	a (Å)	c(Å)	V (Å3)
	B12-C3	-	-	5.64131	12.1228	111.371
	B12-CBC	-	-	5.6569	12.1273	112.029
	B11Cp-CBC	-	-	5.59382	12.0596	109.014
	B12-C3	Al	chain center	5.64072	12.6094	115.784
	B12-C3	Al	chain end	6.20053	11.861	130.546
	B12-C3	Al	equatorial	5.83825	12.3475	121.432
	B12-C3	Al	polar	5.71973	12.8075	119.615
	B12-C3	Be	chain center	5.58941	12.1164	109.266
	B12-C3	Be	chain end	5.76192	12.356	118.053
	B12-C3	Be	equatorial	5.75368	12.0155	114.817
	B12-C3	Be	polar	5.70957	12.2517	115.178
	B12-C3	Mg	chain center	5.63164	12.8154	117.289
	B12-C3	Mg	chain end	5.97172	12.3112	122.977
	B12-C3	Mg	equatorial	5.76075	12.6081	120.572
	B12-C3	Mg	polar	5.67873	13.1759	119.951
	B12-C3	N	chain center	5.63052	12.1973	111.562
	B12-C3	N	chain end	5.5723	12.2452	109.76
	B12-C3	N	equatorial	5.72495	12.1556	114.785
	B12-C3	N	polar	5.59725	12.0863	108.807
	B12-C3	P	chain center	5.63355	12.6296	115.54
	B12-C3	P	chain end	5.9794	12.0574	123.91
	B12-C3	P	equatorial	5.82724	12.5332	122.412
	B12-C3	P	polar	5.65552	12.6292	116.138
	B12-C3	S	chain center	5.68258	12.6137	117.323
	B12-C3	S	chain end	6.0623	12.2118	129.198
	B12-C3	S	equatorial	5.81829	12.6202	123.076
	B12-C3	S	polar	5.72315	12.6919	119.978
	B12-C3	Si	chain center	5.62137	12.6189	115.106
	B12-C3	Si	chain end	6.17049	11.7653	129.012
	B12-C3	Si	equatorial	5.78287	12.4337	120.02
	B12-C3	Si	polar	5.702	12.7004	118.745
	B12-CBC	Al	chain center	5.64059	12.6096	115.781
	B12-CBC	Al	chain end	5.73671	11.8512	112.59
	B12-CBC	Al	equatorial	5.84812	12.391	122.251
	B12-CBC	Al	polar	5.6964	13.0127	120.782
	B12-CBC	Be	chain center	5.58962	12.1158	109.268
	B12-CBC	Be	chain end	5.64702	11.6662	107.394
	B12-CBC	Be	equatorial	5.72773	12.2055	115.587
	B12-CBC	Be	polar	5.72323	12.2397	115.656
	B12-CBC	Mg	chain center	5.63151	12.8152	117.281
	B12-CBC	Mg	chain end	5.71862	12.1136	114.295
	B12-CBC	Mg	equatorial	5.73172	12.8535	121.68
	B12-CBC	Mg	polar	5.66599	13.3304	121.084
	B12-CBC	N	chain center	5.63058	12.1973	111.564
	B12-CBC	N	chain end	5.57292	12.2666	109.977
	B12-CBC	N	equatorial	5.49221	12.6309	109.853
	B12-CBC	N	polar	5.60175	12.2484	110.501
	B12-CBC	P	chain center	5.63351	12.6293	115.536
	B12-CBC	P	chain end	5.85416	12.467	123.338
	B12-CBC	P	equatorial	5.71853	12.6264	119.154
	B12-CBC	P	polar	5.68962	12.6822	118.371
	B12-CBC	S	chain center	5.6826	12.6151	117.338
	B12-CBC	S	chain end	5.76356	12.5185	119.843
	B12-CBC	S	equatorial	5.83703	12.6274	123.878
	B12-CBC	S	polar	5.65699	12.9637	119.598
	B12-CBC	Si	chain center	5.6214	12.6189	115.107
	B12-CBC	Si	chain end	5.86905	12.3192	122.441
	B12-CBC	Si	equatorial	5.78968	12.4495	120.457
	B12-CBC	Si	polar	5.72795	12.6984	120.064
	B11Cp-CBC	Al	chain center	5.61523	12.4667	113.338
	B11Cp-CBC	Al	chain end	5.77395	11.7547	113.063
	B11Cp-CBC	Al	equatorial	5.819	12.2492	119.638
	B11Cp-CBC	Al	polar	5.71075	12.6853	118.442
	B11Cp-CBC	Be	chain center	5.56402	11.9961	107.13
	B11Cp-CBC	Be	chain end	5.6607	11.4099	105.486
	B11Cp-CBC	Be	equatorial	5.66399	12.15	112.444
	B11Cp-CBC	Be	polar	5.66484	12.1898	112.706
	B11Cp-CBC	Mg	chain center	5.63378	12.5408	114.714
	B11Cp-CBC	Mg	chain end	5.71861	11.8899	112.201
	B11Cp-CBC	Mg	equatorial	5.83391	12.3481	121.053
	B11Cp-CBC	Mg	polar	5.56633	12.9956	114.121
	B11Cp-CBC	N	chain center	5.61063	11.8852	107.458
	B11Cp-CBC	N	chain end	5.50361	12.151	105.957
	B11Cp-CBC	N	equatorial	5.40505	12.7595	107.007
	B11Cp-CBC	N	polar	5.57152	12.157	108.405
	B11Cp-CBC	P	chain center	5.63581	12.5505	114.857
	B11Cp-CBC	P	chain end	5.79406	12.2778	118.632
	B11Cp-CBC	P	equatorial	5.69155	12.5961	117.517
	B11Cp-CBC	P	polar	5.6613	12.5536	115.461
	B11Cp-CBC	S	chain center	5.66489	12.5338	116.038
	B11Cp-CBC	S	chain end	5.77554	12.256	117.479
	B11Cp-CBC	S	equatorial	5.68759	13.0315	121.482
	B11Cp-CBC	S	polar	5.71158	12.5858	117.242
	B11Cp-CBC	Si	chain center	5.61504	12.4434	112.989
	B11Cp-CBC	Si	chain end	5.91242	12.2327	123.159
	B11Cp-CBC	Si	equatorial	5.74454	12.3255	117.28
	B11Cp-CBC	Si	polar	5.67361	12.5859	116.308
