# Supplementary material for: Substitution of silicon within the rhombohedral boron carbide (B4C) crystal lattice through high-energy ball-milling
Source: Royal Society of Chemistry journal article supplement (doi:10.1039/c5tc02956b), 2015-01-01
Supplement: c5tc02956b7.pdf [file c5tc02956b7.pdf]

**Table S4.** Energy (eV) for forming Si-substituted structure in different B<sub>4</sub>C lattice sites relative to the lowest energy site over all structures. For B<sub>11</sub>C<sup>P</sup>-CBC, where inequivalent sites of each type exist, the lowest energy site of each type is listed.

| Structure                           | Chain Center | Chain End | Equatorial | Polar |
|-------------------------------------|--------------|-----------|------------|-------|
| B <sub>12</sub> -CCC                | 0.35         | 2.8       | 3.2        | 2.4   |
| B <sub>12</sub> -CBC                | 0.35         | 3.3       | 0.62       | 0.0   |
| B <sub>11</sub> C <sup>P</sup> -CBC | 2.3          | 3.6       | 2.9        | 0.0   |
