# Supplementary material for: Substitution of silicon within the rhombohedral boron carbide (B4C) crystal lattice through high-energy ball-milling
Source: Royal Society of Chemistry journal article supplement (doi:10.1039/c5tc02956b), 2015-01-01
Supplement: c5tc02956b8.pdf [file c5tc02956b8.pdf]

**Table S5:** Relative formation energies for all possible sites of Si in B<sub>11</sub>C<sup>p</sup>-CBC.

chain center

-4.89

chain end

13 near C -3.63

14 far from C -3.37

equatorial

7 nearest C -3.87

10,12 neighbors of 7 -4.30

9,11 neighbors of 10,12 -3.81

8 opposite C -3.90

polar

1 C -7.22

3,5 neighbors of 1 -5.00

4,6 under C -4.79

2 other pole opposite C -4.95
