# Supplementary material for: Substitution of silicon within the rhombohedral boron carbide (B4C) crystal lattice through high-energy ball-milling
Source: Royal Society of Chemistry journal article supplement (doi:10.1039/c5tc02956b), 2015-01-01
Supplement: c5tc02956b10.pdf [file c5tc02956b10.pdf]

**Table S7:** Elemental compositions of B<sub>4</sub>C and B<sub>4</sub>C:Si.

| Boron Carbide                 |                     |          |          | Boron Carbide w/ Silicon      |                     |          |          |
|-------------------------------|---------------------|----------|----------|-------------------------------|---------------------|----------|----------|
| Peak name                     | Binding Energy [eV] | atomic % |          | Peak name                     | Binding Energy [eV] | atomic % |          |
|                               |                     | Mean     | 95% C.I. |                               |                     | Mean     | 95% C.I. |
| B-B                           | 187.3               | 46.8     | 0.9      | B-B                           | 187.3               | 29.9     | 4.5      |
| B-C                           | 188.7               | 16.1     | 1.4      | B-C                           | 188.7               | 10.9     | 3.2      |
| B <sub>2</sub> O <sub>3</sub> | 192.9               | 14.3     | 0.8      | B-O                           | 190.4               | 2.1      | 0.4      |
| C-B                           | 282.2               | 8.5      | 0.4      | B-O                           | 192.0               | 4.1      | 0.6      |
| C-C                           | 284.5               | 11.0     | 0.5      | B <sub>2</sub> O <sub>3</sub> | 193.2               | 9.3      | 1.3      |
| C-O                           | 286.0               | 1.8      | 0.3      | B-Si                          | 186.5               | 12.3     | 4.2      |
| C=O                           | 288.3               | 1.4      | 0.2      | Si-C-B                        | 281.1               | 7.2      | 0.3      |
|                               |                     |          |          | C-B                           | 282.1               | 3.3      | 0.6      |
|                               |                     |          |          | C-Si                          | 283.3               | 7.9      | 1.0      |
|                               |                     |          |          | C-C                           | 284.4               | 4.2      | 1.0      |
|                               |                     |          |          | C-O                           | 285.9               | 1.6      | 0.6      |
|                               |                     |          |          | C=O                           | 287.3               | 0.5      | 0.4      |
|                               |                     |          |          | Si-Si                         | 98.9                | 1.2      | 0.1      |
|                               |                     |          |          | Si-C/B                        | 101.1               | 2.2      | 0.1      |
|                               |                     |          |          | Si-O                          | 102.6               | 3.1      | 0.3      |
